# Supplementary material for: Monosaccharide-Responsive Phenylboronate-Polyol Cell Scaffolds for Cell Sheet and Tissue Engineering Applications
Source: PubMed Central journal article supplement (PMC3805603; doi:10.1371/journal.pone.0077861), 2013-10-22
Supplement: pone.0077861.s001.pdf [file pone.0077861.s001.pdf]

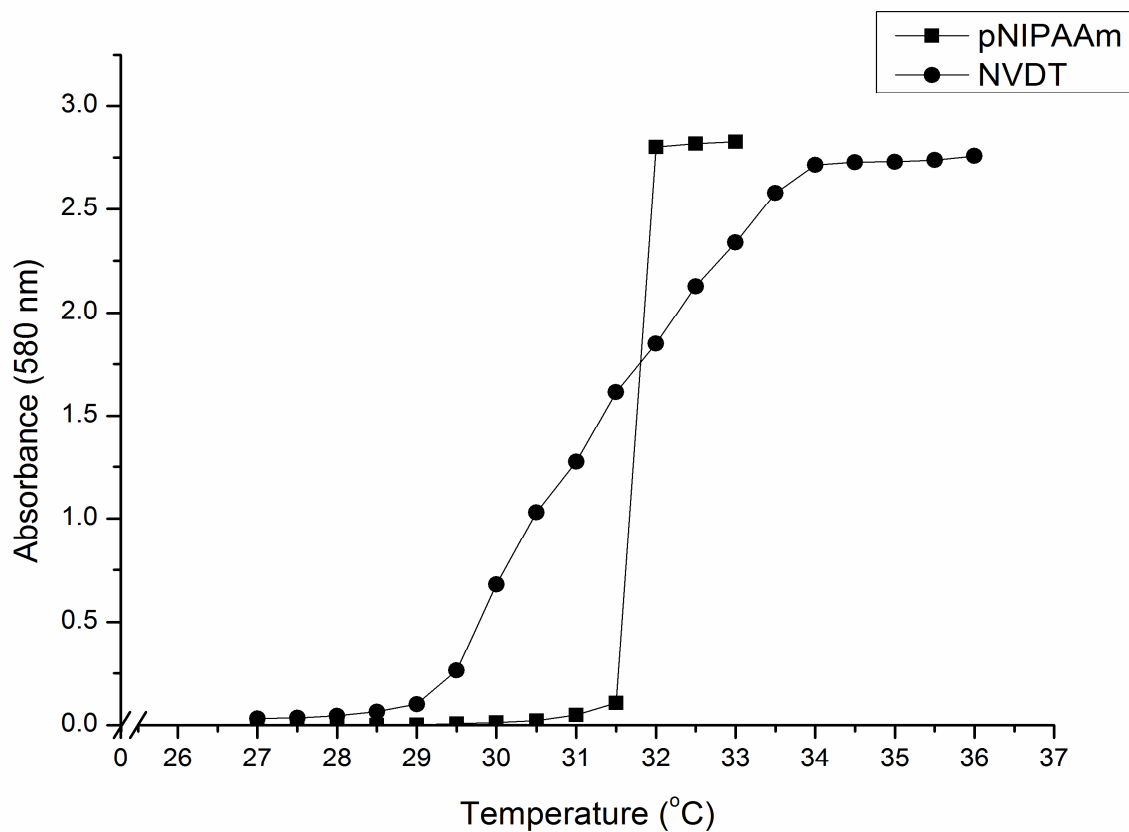

**Figure S1: Lower Critical Solution Temperature (LCST) of poly(N-isopropylacrylamide) (pNIPAAm) and poly(N-isopropylacrylamide-co-vinylphenylboronate-co-N,N-dimethylaminoethylmethacrylate) (NVDT).** The plot presents LCST curves of 0.5% w/v solutions of pNIPAAm (-■-) and NVDT (-●-). The LCST was measured by taking the absorbance at 580 nm of 0.5% w/v polymer solutions at different temperatures.
