# Supplementary material for: Monosaccharide-Responsive Phenylboronate-Polyol Cell Scaffolds for Cell Sheet and Tissue Engineering Applications
Source: PubMed Central journal article supplement (PMC3805603; doi:10.1371/journal.pone.0077861), 2013-10-22
Supplement: pone.0077861.s002.pdf [file pone.0077861.s002.pdf]

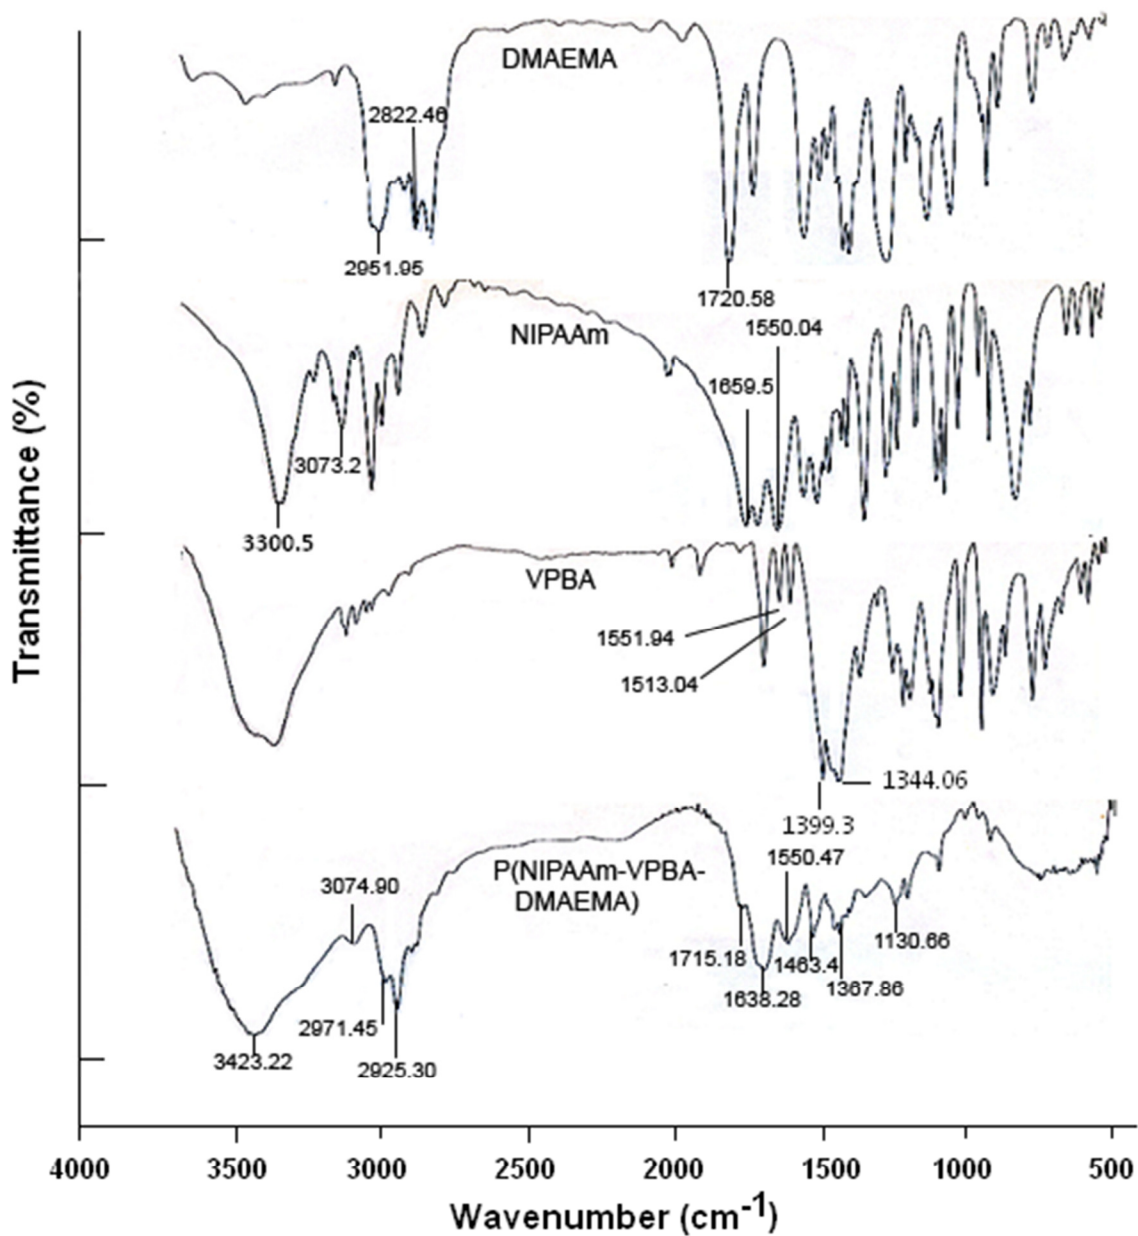

**Figure S2. FT-IR spectra of poly(*N*-isopropylacrylamide-*co*-vinylphenylboronate-*co*-*N,N*-dimethylaminoethylmethacrylate) (NVDT) and the constituent monomers.** FT-IR characterization of NVDT has confirmed the successful copolymerization of the respective monomers. Absorbance of amide-carbonyl group at 1638.28  $\text{cm}^{-1}$  and N-H bending at 1550.47  $\text{cm}^{-1}$  are the characteristic peaks of *N*-isopropylacrylamide (NIPAAm). Appearance of a small peak at 1715.18  $\text{cm}^{-1}$  for C=O stretching confirm the copolymerization of *N,N*-dimethylaminoethylmethacrylate (DMAEMA). Further, two characteristic absorption bands for  $-\text{N}(\text{CH}_3)_2$  of DMAEMA are observed at 2971.45  $\text{cm}^{-1}$  and 2925.30  $\text{cm}^{-1}$ . A broad band of absorbance has appeared at 3423.22  $\text{cm}^{-1}$  for the hydrogen bonded OH-groups of 4-vinylphenylboronate (VPBA). A benzene ring vibration at 1463.39  $\text{cm}^{-1}$ , B-O stretching at 1367.86  $\text{cm}^{-1}$  and B-OH at 1130.66  $\text{cm}^{-1}$  confirms VPBA as a part of the terpolymer.
