# Supplementary material for: Monosaccharide-Responsive Phenylboronate-Polyol Cell Scaffolds for Cell Sheet and Tissue Engineering Applications
Source: PubMed Central journal article supplement (PMC3805603; doi:10.1371/journal.pone.0077861), 2013-10-22
Supplement: pone.0077861.s004.pdf [file pone.0077861.s004.pdf]

**Table 1. Fructose induced disintegration of synthesized PCC-PVA cryogels after 15 days.**

| Cryogel                 | Percentage reduction in cryogel dry weight after 15 days in response to |                   |                   |                |
|-------------------------|-------------------------------------------------------------------------|-------------------|-------------------|----------------|
|                         | Buffer                                                                  | Fructose (100 mM) | Fructose (500 mM) | Fructose (1 M) |
| <b>NVP<sup>A</sup></b>  | 12.45±0.67                                                              | 28.41±2.20        | 61.23±2.0         | 79.98±1.93     |
| <b>AVP<sup>B</sup></b>  | 14.37±0.81                                                              | 51.84±3.34        | 78.17±1.64        | 100            |
| <b>AADP<sup>C</sup></b> | 19.07±0.68                                                              | 100               | 100               | 100            |

The cryogels treated with phosphate buffer have served as controls. Fructose treated cryogels have exhibited significant amounts of disintegration as compared to controls. AADP cryogels have recorded highest levels of fructose-responsiveness followed by AVP and NVP cryogels respectively.

- <sup>A</sup>NVP : Poly(NIPAAm-co-VPBA)-PVA Cryogel  
<sup>B</sup>AVP : Poly(AAm-co-VPBA)-PVA Cryogel  
<sup>C</sup>AADP : poly(AAm-co-AAPBA-co-DMAEMA)-PVA
